# Supplementary material
Source: publisher site journal article supplement (https://www.dovepress.com/article/397300)
Supplement: Supplementary file 1 [file get_supplementary_file.php]

Datum:

Core Team -DKG: (Brust)Operateur, Radiologe, Pathologe, Strahlentherapeut, internistischer Onkologe, gynäkologischer Onkologe (sofern Systemtherapie -gyn-/Chemoth. -Brust- von Gyn durchgeführt)

Zentrums-ID:

Kürzel:

| Characteristic of effective MDT working | Quality Criteria                                                                          | Very Poor                                                                 | Poor                                                                      | Good                                                                             | Very Good                                                                                                                           | Spalte1    |
|-----------------------------------------|-------------------------------------------------------------------------------------------|---------------------------------------------------------------------------|---------------------------------------------------------------------------|----------------------------------------------------------------------------------|-------------------------------------------------------------------------------------------------------------------------------------|------------|
| <b>The Team</b>                         |                                                                                           |                                                                           |                                                                           |                                                                                  |                                                                                                                                     |            |
| Attendance                              | Presence of relevant core team members                                                    | 1 core team member is absent for the whole meeting                        | 1 core team member is absent for most of the meeting (>3 cases)           | 1 core team member is absent for part of the meeting (<2 cases)                  | all core team members present for whole meeting                                                                                     |            |
|                                         |                                                                                           | 1                                                                         | 2                                                                         | 3                                                                                | 4                                                                                                                                   |            |
| Leadership                              | Keeps meeting to agenda                                                                   | Satisfies 0 of criteria                                                   | satisfies 1-2 of criteria                                                 | Satisfies 3 of criteria                                                          | Evidence of all of the criteria                                                                                                     |            |
|                                         | Encourages overall participation                                                          |                                                                           |                                                                           |                                                                                  |                                                                                                                                     |            |
|                                         | Encourages focussed discussion                                                            |                                                                           |                                                                           |                                                                                  |                                                                                                                                     |            |
|                                         | Articulates recommendation                                                                | 1                                                                         | 2                                                                         | 3                                                                                | 4                                                                                                                                   |            |
| <b>Teamworking &amp; culture</b>        |                                                                                           |                                                                           |                                                                           |                                                                                  |                                                                                                                                     |            |
| a) Inclusion of team members            | All members are involved                                                                  | Satisfies 0-1 of criteria                                                 | Satisfies 2-4 of criteria                                                 | Satisfies 3 other criteria                                                       | satisfies all of the criteria                                                                                                       |            |
|                                         | Meeting not dominated by 1-2 people                                                       |                                                                           |                                                                           |                                                                                  |                                                                                                                                     |            |
|                                         | Input/questions volunteered and encouraged                                                |                                                                           |                                                                           |                                                                                  |                                                                                                                                     |            |
|                                         | Contributions facilitate decision-making and/or inform discussion                         |                                                                           |                                                                           |                                                                                  |                                                                                                                                     |            |
|                                         | Consensus of decision-making                                                              | 1                                                                         | 2                                                                         | 3                                                                                | 4                                                                                                                                   |            |
| b) Team Sociability                     | Evidence of humor                                                                         | Satisfies 0 of criteria                                                   | Satisfies 1 of criteria                                                   | Satisfies 2-3 of criteria                                                        | satisfies all of the criteria                                                                                                       |            |
|                                         | Relaxed team                                                                              |                                                                           |                                                                           |                                                                                  |                                                                                                                                     |            |
|                                         | Warm and supportive team environment                                                      |                                                                           |                                                                           |                                                                                  |                                                                                                                                     |            |
|                                         | Friendly and cooperative communication style                                              | 1                                                                         | 2                                                                         | 3                                                                                | 4                                                                                                                                   |            |
| c) Mutual respect                       | Focussed attention                                                                        | Only satisfies 0-1 of criteria                                            | Satisfies 2-3 of criteria                                                 | Evidence of respect, evidence of at least 4 criteria                             | Strong evidence of respect in all/almost all cases                                                                                  |            |
|                                         | Respect for speaker                                                                       |                                                                           |                                                                           |                                                                                  |                                                                                                                                     |            |
|                                         | No concurrent discussions                                                                 |                                                                           |                                                                           |                                                                                  |                                                                                                                                     |            |
|                                         | Asking and valuing relevant contributions                                                 |                                                                           |                                                                           |                                                                                  |                                                                                                                                     |            |
|                                         | General sense of politeness/courtesy                                                      | 1                                                                         | 2                                                                         | 3                                                                                | 4                                                                                                                                   |            |
|                                         |                                                                                           | minus 4                                                                   | minus 3                                                                   | minus 2                                                                          | minus 1                                                                                                                             | 0          |
| d) tension and conflict                 | Extent of tension and/or conflict observable in the team                                  | >1 clear example of conflict observed which persists throughout meeting   | >1 clear example of conflict observed does not persist throughout meeting | >1 instance of tension observed which persists throughout meeting                | >1 instance of tension observed but does not persist throughout meeting                                                             | no tension |
| Personal development & training         | Observable communication of research evidence and/or instances of learning                | No observable communication of research evidence or instances of learning | Minimal communication of research evidence or instances of learning       |                                                                                  | Structured presentation of research evidence and/or learning through formal discussion                                              |            |
|                                         |                                                                                           | 1                                                                         | 2                                                                         | 3                                                                                | 4                                                                                                                                   |            |
| <b>Infrastructure for meetings</b>      |                                                                                           |                                                                           |                                                                           |                                                                                  |                                                                                                                                     |            |
| Meeting venue                           | Room size appropriate for number of team members                                          | Satisfies 0-1 of the criteria                                             | Satisfies 2 of the criteria                                               | Satisfies 3 of the criteria                                                      | Satisfies all of the criteria                                                                                                       |            |
|                                         | Layout of chairs enables accessible viewing of diagnostics                                |                                                                           |                                                                           |                                                                                  |                                                                                                                                     |            |
|                                         | Layout of room allows accessible viewing of other team members                            |                                                                           |                                                                           |                                                                                  |                                                                                                                                     |            |
|                                         | All members seated on a chair                                                             |                                                                           |                                                                           |                                                                                  |                                                                                                                                     |            |
|                                         | Suitable venue in term of location, temperature, lighting                                 | 1                                                                         | 2                                                                         | 3                                                                                | 4                                                                                                                                   |            |
| Technology & equipment                  | Availability of diagnostic equipment to view and share images and pathology with the team | No radiology imaging facilities                                           | Light box available with hard copy film                                   | Current images available digitally with facilities for projecting/viewing images | Current images available digitally with facilities for projecting / viewing images and capability of accessing retrospective images |            |
|                                         |                                                                                           | 1                                                                         | 2                                                                         | 3                                                                                | 4                                                                                                                                   |            |

Datum:

Core Team -DKG: (Brust)Operateur, Radiologe, Pathologe, Strahlentherapeut, internistischer Onkologe, gynäkologischer Onkologe (sofern Systemtherapie -gyn-/Chemoth. -Brust- von Gyn durchgeführt)

Zentrums-ID:

Kürzel:

|                                           |                                                                                          |                                                                                                                |                                                                                                                                      |                                                                                             |                                                                                                              |
|-------------------------------------------|------------------------------------------------------------------------------------------|----------------------------------------------------------------------------------------------------------------|--------------------------------------------------------------------------------------------------------------------------------------|---------------------------------------------------------------------------------------------|--------------------------------------------------------------------------------------------------------------|
| <b>Meeting organisation and logistics</b> |                                                                                          |                                                                                                                |                                                                                                                                      |                                                                                             |                                                                                                              |
| Preparation prior to meetings:            |                                                                                          |                                                                                                                |                                                                                                                                      |                                                                                             |                                                                                                              |
| a) agenda                                 | Availability and content of agenda                                                       | No available agenda                                                                                            | Agenda, but limited info                                                                                                             |                                                                                             | Comprehensive agenda                                                                                         |
|                                           |                                                                                          | 1                                                                                                              | 2                                                                                                                                    |                                                                                             | 3                                                                                                            |
| b) prioritisation of complex cases        | Prioritisation of complex cases on agenda to enable sufficient time for their discussion | No attempt is made to order cases in terms of complexity and an inappropriate amount of time is spent on cases | Some attempt is made to order cases in terms of complexity but an inappropriate amount of time is spent discussing some of the cases | Patient cases are discussed in a clear order but time is used inappropriately in some cases | Patient cases are discussed in a clear order and an appropriate amount of time is spent discussing each case |
|                                           |                                                                                          | 1                                                                                                              | 2                                                                                                                                    | 3                                                                                           | 4                                                                                                            |
| Organisation/admin during meetings:       |                                                                                          |                                                                                                                |                                                                                                                                      |                                                                                             |                                                                                                              |
| a) patient notes                          | Availability of patient notes                                                            | No patient records available                                                                                   | Some required past/current reports not available                                                                                     | Hardcopy and all necessary past/current reports available                                   | Electronic access to patient notes and all necessary past/current reports available                          |
|                                           |                                                                                          | 1                                                                                                              | 2                                                                                                                                    | 3                                                                                           | 4                                                                                                            |
| b) case presentation                      | Comprehensiveness and coherence of case presentation                                     | entirely reading from notes; does not seem familiar with patient                                               | Some evidence of familiarity with patient and info present in reasonable fashion                                                     |                                                                                             | Comprehensive and coherent presentation (evidence of familiarity with patient and findings)                  |
|                                           |                                                                                          | 1                                                                                                              | 2                                                                                                                                    |                                                                                             | 3                                                                                                            |
| Interruptions                             |                                                                                          |                                                                                                                |                                                                                                                                      |                                                                                             |                                                                                                              |
| a) auditory                               | e.g. mobile phone, talking                                                               | >8 auditory interruptions                                                                                      | 3-7 auditory interruptions                                                                                                           | 1-2 auditory interruptions                                                                  | no auditory interruptions                                                                                    |
| b) visual                                 | leaving the room, mobile typing                                                          | >8 visual interruptions                                                                                        | 3-7 visual interruptions                                                                                                             | 1-2 visual interruptions                                                                    | no visual interruptions                                                                                      |
|                                           |                                                                                          | 1                                                                                                              | 2                                                                                                                                    | 3                                                                                           | 4                                                                                                            |
| <b>Clinical decision making</b>           |                                                                                          |                                                                                                                |                                                                                                                                      |                                                                                             |                                                                                                              |
| Patient centered care                     |                                                                                          | No satisfaction of criteria                                                                                    |                                                                                                                                      |                                                                                             | Satisfies criteria                                                                                           |
| a) information                            | Demography, comorbidity                                                                  |                                                                                                                |                                                                                                                                      |                                                                                             |                                                                                                              |
| b) psycho-social                          | Role of emotions                                                                         |                                                                                                                |                                                                                                                                      |                                                                                             |                                                                                                              |
| c) preferences & needs                    | Shared-decision making                                                                   |                                                                                                                |                                                                                                                                      |                                                                                             |                                                                                                              |
|                                           |                                                                                          | 0                                                                                                              |                                                                                                                                      |                                                                                             | 1                                                                                                            |
| <b>Treatment plans</b>                    | Clarity of treatment plan                                                                | Treatment plan not discernable                                                                                 | Treatment plan communicated verbally or recorded                                                                                     | Treatment plan communicated verbally and recorded                                           | Treatment plan communicated verbally, recorded with a clearly articulated plan regarding the next steps      |
|                                           |                                                                                          | 1                                                                                                              | 2                                                                                                                                    | 3                                                                                           | 4                                                                                                            |
| <b>Communication</b>                      |                                                                                          |                                                                                                                |                                                                                                                                      |                                                                                             |                                                                                                              |
| a) comprehensibility                      | Comprehension is ensured                                                                 | Satisfies 0-1 of the criteria                                                                                  | Satisfies 2 of the criteria                                                                                                          | Satisfies 3 of the criteria                                                                 | Satisfies all of the criteria                                                                                |
|                                           | Explanation of terms                                                                     |                                                                                                                |                                                                                                                                      |                                                                                             |                                                                                                              |
|                                           | Avoidance of terms                                                                       |                                                                                                                |                                                                                                                                      |                                                                                             |                                                                                                              |
|                                           | Appropriate speech rate                                                                  |                                                                                                                |                                                                                                                                      |                                                                                             |                                                                                                              |
|                                           |                                                                                          | 1                                                                                                              | 2                                                                                                                                    | 3                                                                                           | 4                                                                                                            |
| b) involvement                            | Direct request                                                                           | Satisfies none of the criteria                                                                                 | Satisfies 1 of the criteria                                                                                                          |                                                                                             | Satisfies all of the criteria                                                                                |
|                                           | Provide space for questions                                                              |                                                                                                                |                                                                                                                                      |                                                                                             |                                                                                                              |
|                                           |                                                                                          | 1                                                                                                              | 2                                                                                                                                    |                                                                                             | 3                                                                                                            |
